# Supplementary material for: Causal inference methods to assist in mechanistic interpretation of classification nano-SAR models
Source: Royal Society of Chemistry journal article supplement (doi:10.1039/c5ra11399g), 2015-01-01
Supplement: c5ra11399g2.xlsx [file c5ra11399g2.xlsx]

## Sheet: ESI 1
Causal inference methods to assist in mechanistic interpretation of classification nano-SAR models
Natalia Sizochenko1,2, Bakhtiyor Rasulev2,4, Agnieszka Gajewicz1, Elena Mokshyna3, Victor Kuz’min3, Jerzy Leszczynski2, Tomasz Puzyn1,*
1Laboratory of Environmental Chemometrics, Faculty of Chemistry, University of Gdansk, Wita Stwosza 63, 80-952, Gdansk, Poland;
2Interdisciplinary Center for Nanotoxicity, Department of Chemistry, Jackson State University, 1400 J. R. Lynch Street, P. O. Box 17910, Jackson, MS 39217, USA;
3A.V. Bogatsky Physical–Chemical Institute National Academy of Sciences of Ukraine, 65080, Odessa, Ukraine;
4Center for Computationally Assisted Science and Technology (CCAST), North Dakota State University, 1805 NDSU Research Park Dr, PO Box 6050, Fargo, ND 58108, USA
*corresponding author: t.puzyn@qsar.eu.org

## Sheet: ESI 1 - Descriptors
	Al2O3	CuO	CeO2	Co3O4	CoO	Cr2O3	Fe2O3	Fe3O4	Gd2O3	HfO2	In2O3	La2O3	Mn2O3	NiO	Ni2O3	Sb2O3	SiO2	SnO2	TiO2	Y2O3	Yb2O3	ZnO	ZrO2	WO3
Initial data
size of single nanoparticles	14.7	12.8	18.3	10	71.8	193	12.3	12	43.8	28.4	59.6	24.6	51.5	13.1	140.6	11.8	13.5	62.4	12.6	32.7	61.7	22.6	40.1	16.6
size in BEGM	260.4	305.3	261.6	222.7	208.3	316.9	206.3	256.6	227.4	307.7	259.8	155.1	298.1	202.8	339.5	274.9	181.9	242.5	109.2	332.2	296.1	114.7	314.3	196.1
size in DMEM	230.5	313.8	248.4	230.3	191.6	318.7	196.6	243.6	222	280.6	244.5	162.6	291.7	189.5	322.6	196.5	46.4	198	55.9	351.6	235.6	69.4	312.3	198.5
Ec (eV)	-1.51	-5.17	-3.8	-4.59	-4.42	-4.44	-4.99	-5	-2.83	-2.96	-3.63	-2.38	-4.65	-3.57	-4.31	-3.64	.2.02	-4.01	-4.16	-5.53	-2.35	-2.83	-3.89	-3.19
PZZP	7.4	7.9	7.8	9.4	9.2	5.3	7.2	5	8	8.1	9.2	9.4	3.7	11.4	8.3	1	1	4	6.4	0.3	9.6	8.2	9.6	5.8
LDM-based descriptors
Wiegner-Seitz radius	1.83237	1.43322	1.77908	2.11667	1.46478	1.91006	1.93805	2.20059	2.2692	1.73182	2.09802	2.28648	2.02423	1.33793	2.01484	2.37584	1.75528	1.72521	1.74437	2.23425	2.16685	1.50531	1.73034	1.97409
number of atoms	64.5395	89.0432	136.042	13.1811	14722	128957	31.9546	20.2692	898.899	551.26	2865.64	155.673	2058.52	117.335	42476.2	15.3145	56.8688	5914.76	47.1089	391.885	2885.89	423.013	1555.78	74.3249
volume of cluster	13299	8780.08	25657.9	4186.67	1549679	30098190	7790.83	7234.56	351796	95901.1	886354	62326.6	571860	9412.01	11636550	6878.83	10300.8	1017237	8374.91	146390	983386	48327.4	269961	19151
surface area	2714.09	2057.83	4206.22	1256	64749.8	467847	1900.2	1808.64	24095.6	10130.4	44615.1	7600.81	33312.3	2155.42	248291	1748.85	2289.06	48905.6	1994.03	3461.03	13430.3	47814.5	6415.15	20196.6
the number of surface molecules	0.997206	0.895763	0.777742	1.69334	0.163207	0.0791733	1.26052	1.46706	0.414467	0.487837	0.281613	0.74357	0.314443	0.817054	0.114642	1.61074	1.04016	0.221181	1.10754	0.546605	0.280953	0.532854	0.345205	0.951368
surface-area-to-volume ratio	356.901	8.59351	3.49927	-2.4423	0.195038	0.0859806	-4.83851	-3.14106	0.707845	0.952502	0.392007	2.89971	0.458668	4.46609	0.129487	-2.63735	-25.8978	0.283995	-10.2989	1.20558	0.39073	1.14066	0.527195	19.5626
AP in BEGM	17.7143	23.8516	14.2951	22.27	2.90111	1.64197	16.7724	21.3833	5.19178	10.8345	4.35906	6.30488	5.78835	15.4809	2.41465	23.2966	13.4741	3.88622	8.66667	10.159	4.79903	5.07522	7.83791	11.8133
AP in DMEM	15.6803	24.5156	13.5738	23.03	2.66852	1.65129	15.9837	20.3	5.06849	9.88028	4.10235	6.60976	5.66408	14.4657	2.29445	16.6525	3.43704	3.17308	4.43651	10.7523	3.81848	3.0708	7.78803	11.9578
Integral (constitutional) descriptors
molecular weigth	102	79.5	172.1	241	75	152	160	232	362.5	210.5	277.6	325.8	158	74.7	165.4	291.4	60	150.7	80	226	394	81.4	123.2	231.9
aligned electronegativity	1.61	1.9	1.12	1.88	1.88	1.66	1.83	1.83	1.81	1.3	1.78	1.1	1.55	1.91	1.91	2.05	1.9	1.96	1.54	1.22	1.1	1.65	1.33	2.36
density, g/sm3	3.96	6.45	7.3	6.07	5.7	5.21	5.25	5.2	7.41	9.68	7.18	6.51	4.55	7.45	4.83	5.19	2.65	7.01	3.6	4.84	9.25	5.7	5.68	7.2
MLB-based descriptors
ionic radius	53.5	73	92	67.5	65	61.5	55	69	62	71	80	103.2	58	69	56	76	40	69	53	90	86.8	74	72	60
covalent index	138.677	263.53	115.405	238.572	229.736	169.469	184.19	231.074	203.118	119.99	253.472	124.872	139.345	251.719	204.294	319.39	144.4	265.07	125.695	133.956	105.028	201.465	127.361	334.176
cation polarizing power	0.168224	0.0547945	0.173913	0.100148	0.0615385	0.146342	0.163636	0.097971	0.145161	0.225352	0.1125	0.0872093	0.155172	0.057971	0.160714	0.118421	0.4	0.231884	0.301887	0.1	0.103687	0.0540541	0.222222	0.6
charge of cation	3	2	4	2.6	2	3	3	2.6	3	4	3	3	3	2	3	3	4	4	4	3	3	2	4	6
SIRMS-based descriptors
Fr2(chg)/A_D/1_2d/	2	1	2	2	1	2	2	2	2	2	2	2	2	1	2	2	2	2	2	2	2	1	2	3
Fr2(chg)/A_D/1_2s/	2	0	0	4	0	2	2	4	2	0	2	2	2	0	2	2	0	0	0	2	2	0	0	0
Fr3(chg)/A_A_D/1_3d,2_3d/	0	0	1	0	0	0	0	0	0	1	0	0	0	0	0	0	1	1	1	0	0	0	1	3
Fr3(chg)/A_A_D/1_3s,2_3d/	2	0	0	2	0	2	2	2	2	0	2	2	2	0	2	2	0	0	0	2	2	0	0	0
Fr3(chg)/A_A_D/1_3s,2_3s/	0	0	0	1	0	0	0	1	0	0	0	0	0	0	0	0	0	0	0	0	0	0	0	0
Fr3(chg)/A_D_D/1_2s,1_3s/	1	0	0	2	0	1	1	2	1	0	1	1	1	0	1	1	0	0	0	1	1	0	0	0
S_A(chg)/A_A_A_A1	0	0	0	1	0	0	0	1	0	0	0	0	0	0	0	0	0	0	0	0	0	0	0	0
S_A(chg)/A_A_A_D/1_4d,2_4d,3_4d/5	0	0	0	0	0	0	0	0	0	0	0	0	0	0	0	0	0	0	0	0	0	0	0	1
S_A(chg)/A_A_A_D/2_4s,3_4d/4	2	0	0	4	0	2	2	4	2	0	2	2	2	0	2	2	0	0	0	2	2	0	0	0
S_A(chg)/A_A_A_D/2_4s,3_4s/4	0	0	0	2	0	0	0	2	0	0	0	0	0	0	0	0	0	0	0	0	0	0	0	0
S_A(chg)/A_A_A_D/3_4d/2	0	0	0	2	0	0	0	2	0	0	0	0	0	0	0	0	0	0	0	0	0	0	0	0
S_A(chg)/A_A_A_D/3_4s/2	0	0	0	4	0	0	0	4	0	0	0	0	0	0	0	0	0	0	0	0	0	0	0	0
S_A(chg)/A_A_D_D/1_3d,2_4d/3	1	0	0	1	0	1	1	1	1	0	1	1	1	0	1	1	0	0	0	1	1	0	0	0
S_A(chg)/A_A_D_D/1_3s,1_4s,2_4d/6	2	0	0	2	0	2	2	2	2	0	2	2	2	0	2	2	0	0	0	2	2	0	0	0
S_A(chg)/A_A_D_D/1_3s,2_4d/3	0	0	0	4	0	0	0	4	0	0	0	0	0	0	0	0	0	0	0	0	0	0	0	0
S_A(chg)/A_A_D_D/1_3s,2_4s/3	0	0	0	1	0	0	0	1	0	0	0	0	0	0	0	0	0	0	0	0	0	0	0	0
S_A(chg)/A_A_D_D/1_4s,2_3s,2_4s/6	0	0	0	2	0	0	0	2	0	0	0	0	0	0	0	0	0	0	0	0	0	0	0	0
S_A(chg)/A_A_D_D/1_4s,2_4d/4	0	0	0	2	0	0	0	2	0	0	0	0	0	0	0	0	0	0	0	0	0	0	0	0
S_A(chg)/A_A_D_D/2_3s,2_4s/4	0	0	0	2	0	0	0	2	0	0	0	0	0	0	0	0	0	0	0	0	0	0	0	0
S_A(chg)/A_A_D_D/2_4d/2	0	0	0	2	0	0	0	2	0	0	0	0	0	0	0	0	0	0	0	0	0	0	0	0
S_A(chg)/A_A_D_D/2_4s/2	0	0	0	2	0	0	0	2	0	0	0	0	0	0	0	0	0	0	0	0	0	0	0	0
S_A(chg)/A_D_D_D/1_3s,1_4s/4	0	0	0	2	0	0	0	2	0	0	0	0	0	0	0	0	0	0	0	0	0	0	0	0
S_A(chg)/A_D_D_D/1_4d/2	0	0	0	2	0	0	0	2	0	0	0	0	0	0	0	0	0	0	0	0	0	0	0	0
Fr2(e612)/_/1_2d/	0	0	0	1	0	1	1	2	1	0	1	1	1	0	1	1	0	0	0	1	1	0	0	0
Fr2(e612)/_/1_2s/	0	0	0	3	0	0	0	1	0	0	0	0	0	0	0	0	0	0	0	0	0	0	0	0
Fr2(e612)/_B/1_2d/	1	0	1	0	0	1	1	0	1	0	1	1	1	0	1	1	0	0	0	1	1	0	1	2
Fr2(e612)/_B/1_2s/	0	0	0	0	0	0	0	1	0	0	0	0	0	0	0	0	0	0	0	0	0	0	0	0
Fr2(e612)/_D/1_2d/	0	0	0	0	0	0	0	0	0	1	0	0	0	0	0	0	1	1	1	0	0	0	0	0
Fr2(e612)/_D/1_2s/	0	0	0	1	0	1	1	1	1	0	1	1	1	0	1	1	0	0	0	1	1	0	0	0
Fr2(e612)/B_D/1_2d/	0	1	1	1	1	0	0	0	0	1	0	0	0	1	0	0	1	1	1	0	0	1	1	1
Fr2(e612)/B_D/1_2s/	1	0	0	0	0	1	1	1	1	0	1	1	1	0	1	1	0	0	0	1	1	0	0	0
Fr2(e612)/D_D/1_2d/	1	0	0	0	0	0	0	0	0	0	0	0	0	0	0	0	0	0	0	0	0	0	0	0
Fr2(e612)/D_D/1_2s/	1	0	0	0	0	0	0	0	0	0	0	0	0	0	0	0	0	0	0	0	0	0	0	0
Fr3(e612)/__/1_2s,2_3d/	0	0	0	1	0	0	0	1	0	0	0	0	0	0	0	0	0	0	0	0	0	0	0	0
Fr3(e612)/__/1_3s,2_3s/	0	0	0	2	0	0	0	0	0	0	0	0	0	0	0	0	0	0	0	0	0	0	0	0
Fr3(e612)/__B/1_2s,2_3s/	0	0	0	0	0	0	0	1	0	0	0	0	0	0	0	0	0	0	0	0	0	0	0	0
Fr3(e612)/__B/1_3d,2_3d/	0	0	0	0	0	0	0	0	0	0	0	0	0	0	0	0	0	0	0	0	0	0	0	1
Fr3(e612)/__D/1_2d,1_3s/	0	0	0	0	0	1	1	1	1	0	1	1	1	0	1	1	0	0	0	1	1	0	0	0
Fr3(e612)/__D/1_2s,2_3s/	0	0	0	1	0	0	0	0	0	0	0	0	0	0	0	0	0	0	0	0	0	0	0	0
Fr3(e612)/_B_D/1_2d,2_3d/	0	0	1	0	0	0	0	0	0	0	0	0	0	0	0	0	0	0	0	0	0	0	1	2
Fr3(e612)/_B_D/1_2d,2_3s/	1	0	0	0	0	1	1	0	1	0	1	1	1	0	1	1	0	0	0	1	1	0	0	0
Fr3(e612)/_B_D/1_2s,2_3s/	0	0	0	0	0	0	0	1	0	0	0	0	0	0	0	0	0	0	0	0	0	0	0	0
Fr3(e612)/_B_D/1_3d,2_3d/	0	0	0	0	0	0	0	0	0	1	0	0	0	0	0	0	1	1	1	0	0	0	0	0
Fr3(e612)/_B_D/1_3s,2_3d/	0	0	0	1	0	0	0	0	0	0	0	0	0	0	0	0	0	0	0	0	0	0	0	0
Fr3(e612)/_B_D/1_3s,2_3s/	0	0	0	0	0	1	1	1	1	0	1	1	1	0	1	1	0	0	0	1	1	0	0	0
Fr3(e612)/B_D_D/1_3s,2_3s/	1	0	0	0	0	0	0	0	0	0	0	0	0	0	0	0	0	0	0	0	0	0	0	0
Fr3(e612)/D_D_D/1_2s,2_3d/	1	0	0	0	0	0	0	0	0	0	0	0	0	0	0	0	0	0	0	0	0	0	0	0
S_A(e612)/___/1_2d,3_4d/3	0	0	0	0	0	0	0	1	0	0	0	0	0	0	0	0	0	0	0	0	0	0	0	0
S_A(e612)/___/1_2s,2_3s,3_4d/6	0	0	0	1	0	0	0	0	0	0	0	0	0	0	0	0	0	0	0	0	0	0	0	0
S_A(e612)/___/1_2s,3_4d/3	0	0	0	1	0	0	0	1	0	0	0	0	0	0	0	0	0	0	0	0	0	0	0	0
S_A(e612)/___/1_3s,2_4s,3_4s/6	0	0	0	1	0	0	0	0	0	0	0	0	0	0	0	0	0	0	0	0	0	0	0	0
S_A(e612)/___/2_3s,3_4d/4	0	0	0	1	0	0	0	2	0	0	0	0	0	0	0	0	0	0	0	0	0	0	0	0
S_A(e612)/___/2_4s,3_4s/4	0	0	0	1	0	0	0	0	0	0	0	0	0	0	0	0	0	0	0	0	0	0	0	0
S_A(e612)/___/3_4d/2	0	0	0	0	0	0	0	1	0	0	0	0	0	0	0	0	0	0	0	0	0	0	0	0
S_A(e612)/___B/1_2d,3_4d/3	0	0	0	0	0	1	1	0	1	0	1	1	1	0	1	1	0	0	0	1	1	0	0	0
S_A(e612)/___B/1_2s,1_4s,2_3d/6	0	0	0	0	0	0	0	1	0	0	0	0	0	0	0	0	0	0	0	0	0	0	0	0
S_A(e612)/___B/1_2s,2_3d/4	0	0	0	1	0	0	0	0	0	0	0	0	0	0	0	0	0	0	0	0	0	0	0	0
S_A(e612)/___B/1_3s,2_3s/4	0	0	0	2	0	0	0	0	0	0	0	0	0	0	0	0	0	0	0	0	0	0	0	0
S_A(e612)/___B/1_4s,2_3d/3	0	0	0	0	0	0	0	1	0	0	0	0	0	0	0	0	0	0	0	0	0	0	0	0
S_A(e612)/___B/2_3d/2	0	0	0	2	0	0	0	4	0	0	0	0	0	0	0	0	0	0	0	0	0	0	0	0
S_A(e612)/___B/2_3s,3_4s/4	0	0	0	0	0	0	0	2	0	0	0	0	0	0	0	0	0	0	0	0	0	0	0	0
S_A(e612)/___B/2_3s/2	0	0	0	4	0	0	0	0	0	0	0	0	0	0	0	0	0	0	0	0	0	0	0	0
S_A(e612)/___B/3_4s/2	0	0	0	0	0	0	0	2	0	0	0	0	0	0	0	0	0	0	0	0	0	0	0	0
S_A(e612)/___B1	0	0	0	1	0	0	0	0	0	0	0	0	0	0	0	0	0	0	0	0	0	0	0	0
S_A(e612)/___D/1_2s,2_3d/4	0	0	0	1	0	0	0	1	0	0	0	0	0	0	0	0	0	0	0	0	0	0	0	0
S_A(e612)/___D/1_2s,2_3s,3_4s/6	0	0	0	1	0	0	0	0	0	0	0	0	0	0	0	0	0	0	0	0	0	0	0	0
S_A(e612)/___D/1_2s,3_4s/3	0	0	0	1	0	0	0	1	0	0	0	0	0	0	0	0	0	0	0	0	0	0	0	0
S_A(e612)/___D/1_3s,2_3s/4	0	0	0	1	0	0	0	0	0	0	0	0	0	0	0	0	0	0	0	0	0	0	0	0
S_A(e612)/___D/1_4s,2_3d/3	0	0	0	1	0	0	0	1	0	0	0	0	0	0	0	0	0	0	0	0	0	0	0	0
S_A(e612)/___D/2_3d,2_4s/4	0	0	0	0	0	1	1	3	1	0	1	1	1	0	1	1	0	0	0	1	1	0	0	0
S_A(e612)/___D/2_3d/2	0	0	0	1	0	0	0	1	0	0	0	0	0	0	0	0	0	0	0	0	0	0	0	0
S_A(e612)/___D/2_3s,3_4s/4	0	0	0	2	0	0	0	0	0	0	0	0	0	0	0	0	0	0	0	0	0	0	0	0
S_A(e612)/___D/2_3s/2	0	0	0	1	0	0	0	1	0	0	0	0	0	0	0	0	0	0	0	0	0	0	0	0
S_A(e612)/___D/3_4s/2	0	0	0	1	0	0	0	1	0	0	0	0	0	0	0	0	0	0	0	0	0	0	0	0
S_A(e612)/___D1	0	0	0	0	0	0	0	1	0	0	0	0	0	0	0	0	0	0	0	0	0	0	0	0
S_A(e612)/__B_D/1_2d,1_4s,3_4s/6	0	0	0	0	0	1	1	1	1	0	1	1	1	0	1	1	0	0	0	1	1	0	0	0
S_A(e612)/__B_D/1_2d,3_4d/3	0	0	0	1	0	0	0	0	0	0	0	0	0	0	0	0	0	0	0	0	0	0	0	0
S_A(e612)/__B_D/1_2d,3_4s/3	0	0	0	0	0	0	0	1	0	0	0	0	0	0	0	0	0	0	0	0	0	0	0	0
S_A(e612)/__B_D/1_2s,2_3s,3_4s/6	0	0	0	0	0	0	0	1	0	0	0	0	0	0	0	0	0	0	0	0	0	0	0	0
S_A(e612)/__B_D/1_2s,2_4s,3_4d/6	0	0	0	1	0	0	0	0	0	0	0	0	0	0	0	0	0	0	0	0	0	0	0	0
S_A(e612)/__B_D/1_2s,3_4d/3	0	0	0	2	0	0	0	0	0	0	0	0	0	0	0	0	0	0	0	0	0	0	0	0
S_A(e612)/__B_D/1_3d,2_3d,3_4d/5	0	0	0	0	0	0	0	0	0	0	0	0	0	0	0	0	0	0	0	0	0	0	0	1
S_A(e612)/__B_D/1_3s,2_4s,3_4s/6	0	0	0	0	0	0	0	1	0	0	0	0	0	0	0	0	0	0	0	0	0	0	0	0
S_A(e612)/__B_D/1_4s,2_3d,3_4s/6	0	0	0	0	0	1	1	0	1	0	1	1	1	0	1	1	0	0	0	1	1	0	0	0
S_A(e612)/__B_D/2_3d,3_4s/4	0	0	0	0	0	1	1	0	1	0	1	1	1	0	1	1	0	0	0	1	1	0	0	0
S_A(e612)/__B_D/2_3s,3_4s/4	0	0	0	0	0	0	0	2	0	0	0	0	0	0	0	0	0	0	0	0	0	0	0	0
S_A(e612)/__B_D/2_4s,3_4d/4	0	0	0	3	0	0	0	0	0	0	0	0	0	0	0	0	0	0	0	0	0	0	0	0
S_A(e612)/__B_D/2_4s,3_4s/4	0	0	0	0	0	0	0	2	0	0	0	0	0	0	0	0	0	0	0	0	0	0	0	0
S_A(e612)/__B_D/3_4d/2	0	0	0	3	0	0	0	0	0	0	0	0	0	0	0	0	0	0	0	0	0	0	0	0
S_A(e612)/__B_D/3_4s/2	0	0	0	0	0	0	0	2	0	0	0	0	0	0	0	0	0	0	0	0	0	0	0	0
S_A(e612)/_B_D_D/1_2d,2_4s,3_4s/6	1	0	0	0	0	0	0	0	0	0	0	0	0	0	0	0	0	0	0	0	0	0	0	0
S_A(e612)/_B_D_D/1_2d,2_4s/4	1	0	0	0	0	0	0	0	0	0	0	0	0	0	0	0	0	0	0	0	0	0	0	0
S_A(e612)/_B_D_D/1_2d,3_4d/3	1	0	0	0	0	0	0	0	0	0	0	0	0	0	0	0	0	0	0	0	0	0	0	0
S_A(e612)/_D_D_D/2_3s,3_4d/4	1	0	0	0	0	0	0	0	0	0	0	0	0	0	0	0	0	0	0	0	0	0	0	0
S_A(e612)/B_D_D_D/1_2s,2_3s,3_4d/6	1	0	0	0	0	0	0	0	0	0	0	0	0	0	0	0	0	0	0	0	0	0	0	0
Fr2(en)/A_D/1_2d/	2	1	2	2	1	2	2	2	2	2	2	2	2	1	2	2	2	2	2	2	2	1	2	0
Fr2(en)/A_D/1_2s/	2	0	0	4	0	2	2	4	2	0	2	2	2	0	2	2	0	0	0	2	2	0	0	0
Fr2(en)/B_D/1_2d/	0	0	0	0	0	0	0	0	0	0	0	0	0	0	0	0	0	0	0	0	0	0	0	3
Fr3(en)/A_A_D/1_3s,2_3s/	1	0	0	2	0	1	1	2	1	0	1	1	1	0	1	1	0	0	0	1	1	0	0	0
Fr3(en)/A_D_D/1_2d,1_3d/	0	0	1	0	0	0	0	0	0	1	0	0	0	0	0	0	1	1	1	0	0	0	1	0
Fr3(en)/A_D_D/1_2s,1_3d/	2	0	0	2	0	2	2	2	2	0	2	2	2	0	2	2	0	0	0	2	2	0	0	0
Fr3(en)/A_D_D/1_2s,1_3s/	0	0	0	1	0	0	0	1	0	0	0	0	0	0	0	0	0	0	0	0	0	0	0	0
Fr3(en)/B_D_D/1_2d,1_3d/	0	0	0	0	0	0	0	0	0	0	0	0	0	0	0	0	0	0	0	0	0	0	0	3
S_A(en)/A_A_A_D/2_4s,3_4s/4	0	0	0	2	0	0	0	2	0	0	0	0	0	0	0	0	0	0	0	0	0	0	0	0
S_A(en)/A_A_A_D/3_4d/2	0	0	0	2	0	0	0	2	0	0	0	0	0	0	0	0	0	0	0	0	0	0	0	0
S_A(en)/A_A_D_D/1_3d,2_4d/3	1	0	0	1	0	1	1	1	1	0	1	1	1	0	1	1	0	0	0	1	1	0	0	0
S_A(en)/A_A_D_D/1_3s,2_3s,2_4d/6	2	0	0	2	0	2	2	2	2	0	2	2	2	0	2	2	0	0	0	2	2	0	0	0
S_A(en)/A_A_D_D/1_3s,2_4d/3	0	0	0	4	0	0	0	4	0	0	0	0	0	0	0	0	0	0	0	0	0	0	0	0
S_A(en)/A_A_D_D/1_3s,2_4s/3	0	0	0	1	0	0	0	1	0	0	0	0	0	0	0	0	0	0	0	0	0	0	0	0
S_A(en)/A_A_D_D/1_4s,2_3s,2_4s/6	0	0	0	2	0	0	0	2	0	0	0	0	0	0	0	0	0	0	0	0	0	0	0	0
S_A(en)/A_A_D_D/1_4s,2_4s/4	0	0	0	2	0	0	0	2	0	0	0	0	0	0	0	0	0	0	0	0	0	0	0	0
S_A(en)/A_A_D_D/2_3s,2_4d/4	0	0	0	2	0	0	0	2	0	0	0	0	0	0	0	0	0	0	0	0	0	0	0	0
S_A(en)/A_A_D_D/2_4d/2	0	0	0	2	0	0	0	2	0	0	0	0	0	0	0	0	0	0	0	0	0	0	0	0
S_A(en)/A_A_D_D/2_4s/2	0	0	0	2	0	0	0	2	0	0	0	0	0	0	0	0	0	0	0	0	0	0	0	0
S_A(en)/A_D_D_D/1_3s,1_4d/4	2	0	0	4	0	2	2	4	2	0	2	2	2	0	2	2	0	0	0	2	2	0	0	0
S_A(en)/A_D_D_D/1_3s,1_4s/4	0	0	0	2	0	0	0	2	0	0	0	0	0	0	0	0	0	0	0	0	0	0	0	0
S_A(en)/A_D_D_D/1_4d/2	0	0	0	2	0	0	0	2	0	0	0	0	0	0	0	0	0	0	0	0	0	0	0	0
S_A(en)/A_D_D_D/1_4s/2	0	0	0	4	0	0	0	4	0	0	0	0	0	0	0	0	0	0	0	0	0	0	0	0
S_A(en)/B_D_D_D/1_2d,1_3d,1_4d/5	0	0	0	0	0	0	0	0	0	0	0	0	0	0	0	0	0	0	0	0	0	0	0	1
S_A(en)/D_D_D_D1	0	0	0	1	0	0	0	1	0	0	0	0	0	0	0	0	0	0	0	0	0	0	0	0
Fr2(r612)/_/1_2d/	1	0	0	1	0	1	1	2	1	0	1	1	1	0	1	1	0	0	0	1	1	0	0	0
Fr2(r612)/_/1_2s/	0	0	0	3	0	0	0	1	0	0	0	0	0	0	0	0	0	0	0	0	0	0	0	0
Fr2(r612)/_B/1_2d/	1	0	1	0	0	1	1	0	1	0	1	1	1	0	1	1	0	0	0	1	1	0	1	2
Fr2(r612)/_B/1_2s/	0	0	0	0	0	0	0	1	0	0	0	0	0	0	0	0	0	0	0	0	0	0	0	0
Fr2(r612)/_D/1_2d/	0	0	0	0	0	0	0	0	0	1	0	0	0	0	0	0	1	1	1	0	0	0	0	0
Fr2(r612)/_D/1_2s/	1	0	0	1	0	1	1	1	1	0	1	1	1	0	1	1	0	0	0	1	1	0	0	0
Fr2(r612)/B_D/1_2d/	0	1	1	1	1	0	0	0	0	1	0	0	0	1	0	0	1	1	1	0	0	1	1	1
Fr2(r612)/B_D/1_2s/	1	0	0	0	0	1	1	1	1	0	1	1	1	0	1	1	0	0	0	1	1	0	0	0
Fr3(r612)/__/1_2s,2_3d/	0	0	0	1	0	0	0	1	0	0	0	0	0	0	0	0	0	0	0	0	0	0	0	0
Fr3(r612)/__/1_3s,2_3s/	0	0	0	2	0	0	0	0	0	0	0	0	0	0	0	0	0	0	0	0	0	0	0	0
Fr3(r612)/__B/1_2s,2_3s/	0	0	0	0	0	0	0	1	0	0	0	0	0	0	0	0	0	0	0	0	0	0	0	0
Fr3(r612)/__B/1_3d,2_3d/	0	0	0	0	0	0	0	0	0	0	0	0	0	0	0	0	0	0	0	0	0	0	0	1
Fr3(r612)/__D/1_2d,1_3s/	1	0	0	0	0	1	1	1	1	0	1	1	1	0	1	1	0	0	0	1	1	0	0	0
Fr3(r612)/__D/1_2s,2_3s/	0	0	0	1	0	0	0	0	0	0	0	0	0	0	0	0	0	0	0	0	0	0	0	0
Fr3(r612)/_B_D/1_2d,2_3d/	0	0	1	0	0	0	0	0	0	0	0	0	0	0	0	0	0	0	0	0	0	0	1	2
Fr3(r612)/_B_D/1_2d,2_3s/	1	0	0	0	0	1	1	0	1	0	1	1	1	0	1	1	0	0	0	1	1	0	0	0
Fr3(r612)/_B_D/1_2s,2_3s/	0	0	0	0	0	0	0	1	0	0	0	0	0	0	0	0	0	0	0	0	0	0	0	0
Fr3(r612)/_B_D/1_3d,2_3d/	0	0	0	0	0	0	0	0	0	1	0	0	0	0	0	0	1	1	1	0	0	0	0	0
Fr3(r612)/_B_D/1_3s,2_3d/	0	0	0	1	0	0	0	0	0	0	0	0	0	0	0	0	0	0	0	0	0	0	0	0
Fr3(r612)/_B_D/1_3s,2_3s/	1	0	0	0	0	1	1	1	1	0	1	1	1	0	1	1	0	0	0	1	1	0	0	0
S_A(r612)/___/1_2d,3_4d/3	0	0	0	0	0	0	0	1	0	0	0	0	0	0	0	0	0	0	0	0	0	0	0	0
S_A(r612)/___/1_2s,2_3s,3_4d/6	0	0	0	1	0	0	0	0	0	0	0	0	0	0	0	0	0	0	0	0	0	0	0	0
S_A(r612)/___/1_2s,3_4d/3	0	0	0	1	0	0	0	1	0	0	0	0	0	0	0	0	0	0	0	0	0	0	0	0
S_A(r612)/___/1_3s,2_4s,3_4s/6	0	0	0	1	0	0	0	0	0	0	0	0	0	0	0	0	0	0	0	0	0	0	0	0
S_A(r612)/___/2_3s,3_4d/4	0	0	0	1	0	0	0	2	0	0	0	0	0	0	0	0	0	0	0	0	0	0	0	0
S_A(r612)/___/2_4s,3_4s/4	0	0	0	1	0	0	0	0	0	0	0	0	0	0	0	0	0	0	0	0	0	0	0	0
S_A(r612)/___/3_4d/2	0	0	0	0	0	0	0	1	0	0	0	0	0	0	0	0	0	0	0	0	0	0	0	0
S_A(r612)/___B/1_2d,3_4d/3	1	0	0	0	0	1	1	0	1	0	1	1	1	0	1	1	0	0	0	1	1	0	0	0
S_A(r612)/___B/1_2s,1_4s,2_3d/6	0	0	0	0	0	0	0	1	0	0	0	0	0	0	0	0	0	0	0	0	0	0	0	0
S_A(r612)/___B/1_2s,2_3d/4	0	0	0	1	0	0	0	0	0	0	0	0	0	0	0	0	0	0	0	0	0	0	0	0
S_A(r612)/___B/1_3s,2_3s/4	0	0	0	2	0	0	0	0	0	0	0	0	0	0	0	0	0	0	0	0	0	0	0	0
S_A(r612)/___B/1_4s,2_3d/3	0	0	0	0	0	0	0	1	0	0	0	0	0	0	0	0	0	0	0	0	0	0	0	0
S_A(r612)/___B/2_3d/2	0	0	0	2	0	0	0	4	0	0	0	0	0	0	0	0	0	0	0	0	0	0	0	0
S_A(r612)/___B/2_3s,3_4s/4	0	0	0	0	0	0	0	2	0	0	0	0	0	0	0	0	0	0	0	0	0	0	0	0
S_A(r612)/___B/2_3s/2	0	0	0	4	0	0	0	0	0	0	0	0	0	0	0	0	0	0	0	0	0	0	0	0
S_A(r612)/___B/3_4s/2	0	0	0	0	0	0	0	2	0	0	0	0	0	0	0	0	0	0	0	0	0	0	0	0
S_A(r612)/___B1	0	0	0	1	0	0	0	0	0	0	0	0	0	0	0	0	0	0	0	0	0	0	0	0
S_A(r612)/___D/1_2s,2_3d/4	0	0	0	1	0	0	0	1	0	0	0	0	0	0	0	0	0	0	0	0	0	0	0	0
S_A(r612)/___D/1_2s,2_3s,3_4s/6	0	0	0	1	0	0	0	0	0	0	0	0	0	0	0	0	0	0	0	0	0	0	0	0
S_A(r612)/___D/1_2s,3_4s/3	0	0	0	1	0	0	0	1	0	0	0	0	0	0	0	0	0	0	0	0	0	0	0	0
S_A(r612)/___D/1_3s,2_3s/4	0	0	0	1	0	0	0	0	0	0	0	0	0	0	0	0	0	0	0	0	0	0	0	0
S_A(r612)/___D/1_4s,2_3d/3	0	0	0	1	0	0	0	1	0	0	0	0	0	0	0	0	0	0	0	0	0	0	0	0
S_A(r612)/___D/2_3d,2_4s/4	1	0	0	0	0	1	1	3	1	0	1	1	1	0	1	1	0	0	0	1	1	0	0	0
S_A(r612)/___D/2_3d/2	0	0	0	1	0	0	0	1	0	0	0	0	0	0	0	0	0	0	0	0	0	0	0	0
S_A(r612)/___D/2_3s,3_4s/4	0	0	0	2	0	0	0	0	0	0	0	0	0	0	0	0	0	0	0	0	0	0	0	0
S_A(r612)/___D/2_3s/2	0	0	0	1	0	0	0	1	0	0	0	0	0	0	0	0	0	0	0	0	0	0	0	0
S_A(r612)/___D/3_4s/2	0	0	0	1	0	0	0	1	0	0	0	0	0	0	0	0	0	0	0	0	0	0	0	0
S_A(r612)/___D1	0	0	0	0	0	0	0	1	0	0	0	0	0	0	0	0	0	0	0	0	0	0	0	0
S_A(r612)/__B_D/1_2d,1_4s,3_4s/6	1	0	0	0	0	1	1	1	1	0	1	1	1	0	1	1	0	0	0	1	1	0	0	0
S_A(r612)/__B_D/1_2d,3_4d/3	0	0	0	1	0	0	0	0	0	0	0	0	0	0	0	0	0	0	0	0	0	0	0	0
S_A(r612)/__B_D/1_2d,3_4s/3	0	0	0	0	0	0	0	1	0	0	0	0	0	0	0	0	0	0	0	0	0	0	0	0
S_A(r612)/__B_D/1_2s,2_3s,3_4s/6	0	0	0	0	0	0	0	1	0	0	0	0	0	0	0	0	0	0	0	0	0	0	0	0
S_A(r612)/__B_D/1_2s,2_4s,3_4d/6	0	0	0	1	0	0	0	0	0	0	0	0	0	0	0	0	0	0	0	0	0	0	0	0
S_A(r612)/__B_D/1_2s,3_4d/3	0	0	0	2	0	0	0	0	0	0	0	0	0	0	0	0	0	0	0	0	0	0	0	0
S_A(r612)/__B_D/1_3d,2_3d,3_4d/5	0	0	0	0	0	0	0	0	0	0	0	0	0	0	0	0	0	0	0	0	0	0	0	1
S_A(r612)/__B_D/1_3s,2_4s,3_4s/6	0	0	0	0	0	0	0	1	0	0	0	0	0	0	0	0	0	0	0	0	0	0	0	0
S_A(r612)/__B_D/1_4s,2_3d,3_4s/6	1	0	0	0	0	1	1	0	1	0	1	1	1	0	1	1	0	0	0	1	1	0	0	0
S_A(r612)/__B_D/2_3d,3_4s/4	1	0	0	0	0	1	1	0	1	0	1	1	1	0	1	1	0	0	0	1	1	0	0	0
S_A(r612)/__B_D/2_3s,3_4s/4	0	0	0	0	0	0	0	2	0	0	0	0	0	0	0	0	0	0	0	0	0	0	0	0
S_A(r612)/__B_D/2_4s,3_4d/4	0	0	0	3	0	0	0	0	0	0	0	0	0	0	0	0	0	0	0	0	0	0	0	0
S_A(r612)/__B_D/2_4s,3_4s/4	0	0	0	0	0	0	0	2	0	0	0	0	0	0	0	0	0	0	0	0	0	0	0	0
S_A(r612)/__B_D/3_4d/2	0	0	0	3	0	0	0	0	0	0	0	0	0	0	0	0	0	0	0	0	0	0	0	0
S_A(r612)/__B_D/3_4s/2	0	0	0	0	0	0	0	2	0	0	0	0	0	0	0	0	0	0	0	0	0	0	0	0
